1 **Comparative Genomic Analysis of Fifty-Two *Staphylococcus aureus* Isolates**  
2 **Identified from Uncharacterized *Staphylococcus* Genomes in**  
3 **the NCBI database**

4

5

6

7 Mohamed A. Abouelkhair <sup>a#</sup>

8

9 <sup>a</sup>Department of Biomedical and Diagnostic Sciences, University of Tennessee College of

10 Veterinary Medicine, Knoxville, Tennessee, USA

11

12

13

14

15

16 # Corresponding Author:

17

18 Mohamed A. Abouelkhair

19 2407 River Dr, Knoxville, TN 37996, USA

20 Email address: [mabouelk@vols.utk.edu](mailto:mabouelk@vols.utk.edu)

21

22

23

24

25

26

27

## 28 **Abstract**

29 **Background:** *Staphylococcus aureus* is a major bacterial pathogen that causes a variety of  
30 diseases, ranging from wound infections to severe bacteremia or food poisoning. The course and  
31 severity of the disease are mainly dependent on the bacterium genotype as well as host factors.  
32 Whole-genome sequencing (WGS) is currently the most extensive genotyping method available,  
33 followed by bioinformatic sequence analysis.

34 **Methods:** A total of 253 uncharacterized staphylococcus genome sequences were downloaded  
35 from the National Center for Biotechnology Information (NCBI) (August 2012 to March 2020)  
36 from different studies. Samples were clustered based on core and accessory pairwise distances  
37 between isolates and then analyzed by multilocus sequence typing tool (MLST). Staphylococcal  
38 Cassette Chromosome *mec* (SCC*mec*), *spa* typing, variant calling, core genome alignment, and  
39 recombination sites prediction were performed on detected *S. aureus* isolates. *S. aureus* isolates  
40 were also analyzed for the presence of genes coding for virulence factors and antibiotic  
41 resistance.

42 **Results and conclusion:** Uncategorized genome sequences were clustered into 24 groups. About  
43 182 uncharacterized Staphylococcus genomes were identified at the species level based on  
44 MLST, including 32 *S. lugdunensis* genome sequence, thus doubling the number of the publicly  
45 accessible *S. lugdunensis* genome sequence in Genbank. MLST identified another four species  
46 (*S. epidermidis* (33/253), *S. lugdunensis* (32/253), *S. haemolyticus* (41/253), *S. hominis* (24/253)  
47 and *S. aureus* (52/253)). Among the 52 *S. aureus* isolates, 21 (40.38%) isolates carried *mecA*  
48 gene, with 57.14% classified as SCC*mec* IV. The results of this study provide knowledge that  
49 facilitates evolutionary studies of staphylococcal species and other bacteria at the genome level.

## 50 **Introduction**

51 *Staphylococcus aureus* bacterium is worldwide distributed and is responsible for several human  
52 and animal diseases ranging from mild to life-threatening infections (1, 2). It is of considerable  
53 importance because of its ability to induce a multitude of infections and adapt to various  
54 environmental conditions. *S. aureus* is one of the most significant causes of hospital and  
55 community-acquired infections, with serious consequences (3). The emergence of methicillin-  
56 resistant *S. aureus* (MRSA) places a major burden on the public health care system. Along with  
57 evolving several mechanisms that confer resistance to antibiotic compounds, *S. aureus* produces  
58 a vast arsenal of virulence proteins, including exotoxins, tissue-degrading enzymes, leucocidins,  
59 and immunomodulating proteins (4-6).

60 Accurate molecular typing is important for tracking outbreaks, determining the probable source  
61 of colonization (livestock or human associated), and distinguishing between the community and  
62 hospital-acquired strains. Various typing methods such as multilocus sequence typing (MLST),  
63 SCC*mec* typing, and *spa* typing can be used to identify methicillin-resistant *S. aureus* (MRSA)  
64 lineages and strains. Molecular biology and biotechnology advances have made the entire  
65 genome sequencing accessible for research in microbiology. Whole-genomic microbes'  
66 sequences can provide comprehensive information on virulence factors, pathogenesis, drug  
67 resistance, metabolism, the interaction between host-pathogen, MLST, SCC*mec*, and *spa* types.

68 GenBank® is an extensive and reliable database which contains publicly available nucleotide  
69 sequences (7). There are more than 14,000 genome assemblies available for 54 staphylococcus  
70 species. In this study, we used a genomic approach to identify *S. epidermidis*, *S. lugdunensis*, *S.*  
71 *haemolyticus*, *S. hominis*, and *S. aureus* from uncategorized genome sequences in

72 the NCBI database. They are annotated as isolates in a staphylococcus population, which are  
73 significantly different from currently recognized species. The specific objectives of this study  
74 were to characterize these isolates and identify the genomic characteristics of identified *S. aureus*  
75 isolates.

## 76 **Material and Methods**

77

### 78 **Genomes annotation, and population structure analysis**

79 Uncharacterized staphylococcus genome sequences were downloaded from NCBI  
80 (<https://www.ncbi.nlm.nih.gov/genome/browse#!/prokaryotes/13533/>) (August 2012 to March  
81 2020) from different studies. *Enterobacter cloacae* with a genome size of 4.8 Megabases (Mb) in  
82 addition to four plasmids were found in the group and excluded from the study.

83 The assemblies were annotated using Prokka (<https://github.com/tseemann/prokka>) (8). We used  
84 PopPUNK (Population Partitioning Using Nucleotide K-mers;  
85 <https://poppunk.readthedocs.io/en/latest/>) to elucidate the population structure of staphylococcus  
86 based on the divergence of both shared sequence and gene content within a population.

87 PopPUNK compares all possible pairs of genomes by calculating the proportion of k-mers  
88 shared of different lengths to determine the distances between the core and accessory genomes. It  
89 then generates a scatterplot of the two distances to reveal the isolates predicted to cluster (9).

90 The genome sequences of identified *S. aureus* were uploaded to the Type (Strain) Genome  
91 Server (TYGS), a free bioinformatics platform available under <https://tygs.dsmz.de>, for a whole  
92 genome-based taxonomic analysis (10). Determination of closest type strain genomes was done  
93 in two complementary ways: First, all *S. aureus* genomes were compared against all type strain  
94 genomes available in the TYGS database via the MASH algorithm, a fast approximation of

95 intergenomic relatedness (11), and, the ten type strains with the smallest MASH distances  
96 chosen. Second, an additional set of ten closely related type strains was determined via the 16S  
97 rDNA gene sequences. These sequences were extracted from the *S. aureus* genomes using  
98 RNAmmer (12), and each sequence was subsequently BLASTed (13) against the 16S rDNA  
99 gene sequence of each of the currently 11820 type strains available in the TYGS database. This  
100 was used as a proxy to find the best fifty matching type strains (according to the bitscore) for  
101 each *S. aureus* genome and to subsequently calculate precise distances using the Genome  
102 BLAST Distance Phylogeny approach (GBDP) under the algorithm 'coverage' and distance  
103 formula  $d_5$  (14). These distances were finally used to determine the ten closest type strain  
104 genomes for each of the *S. aureus* genomes.

105 All pairwise comparisons among the set of genomes were conducted using GBDP and accurate  
106 intergenomic distances inferred under the algorithm 'trimming' and distance formula  $d_5$  (14). One  
107 hundred distance replicates were calculated each. Digital DDH values and confidence intervals  
108 were calculated using the recommended settings of the GGDC v.2.1 (14). The resulting  
109 intergenomic distances were used to infer a balanced minimum evolution tree with branch  
110 support via FASTME v.2.1.4, including SPR postprocessing (15). Branch support was inferred  
111 from 100 pseudo-bootstrap replicates each. The trees were rooted at the midpoint (16) and  
112 visualized with PhyD3 (17). The type-based species clustering using a 70% dDDH radius around  
113 each of the 28 type strains was done as previously described (10).

114

### 115 ***In silico* molecular typing**

116 Sequence type (ST) identification of isolates was performed using the program MLST  
117 (<https://github.com/tseemann/mlst>) (18), which extracts the sequences of seven housekeeping

118 genes (*arcC*, *aroE*, *glpF*, *gmk*, *pta*, *tpi*, *yqiL*) from the assembly files. This program made use of  
119 the PubMLST website (<https://pubmlst.org/>) developed by Keith Jolley (19) and sited at the  
120 University of Oxford.

121

## 122 **Detection of genes coding for antimicrobial resistance and virulence proteins**

123 We screened all of the genomes for known resistance genes using NCBI Antimicrobial  
124 Resistance Gene Finder v.3.8 (AMRFinderPlus) (<https://github.com/ncbi/amr>) (20). To identify  
125 the gene coding for virulence factors, we used the contig-based search method ABRicate  
126 v.0.8.13 (<https://github.com/tseemann/abricate>). We created a custom abricate database for  
127 *staphylocoagulase*.

## 128 **SCC*mec* typing, spa typing**

129 Genomes carrying the *mecA*-carrying chromosomal cassette SCC*mec* were identified using  
130 SCC*mec*Finder v.1.2 (21) with minimum thresholds of >60% for sequence coverage and >90%  
131 sequence identity whereas spa typing was performed using spaTyper v.1.0 (22). We used the  
132 default parameters for each program.

## 133 **Predicting Recombination Sites by Phylogenetic Analysis**

134 We aligned the 52 isolates against the reference genome of *S. aureus* NCTC 8325 by using  
135 Snippy v.4.6.0 (<https://github.com/tseemann/snippy>), which uses the Burrow-Wheeler Aligner  
136 (BWA) to map the reads to the reference and then calls the subsequent single-nucleotide  
137 polymorphisms (SNPs) and insertions/deletions (indels). We used the whole-genome core SNPs  
138 alignment output from Snippy for downstream phylogenetic analysis, assessed recombination

139 sites by using Genealogies Unbiased By recomBinations In Nucleotide Sequences v.2.4.1  
140 (Gubbins) (<https://github.com/sanger-pathogens/gubbins>) (23). After five iterations, Gubbins  
141 reached a stable tree topology and determined regions of genetic recombination. Fastree v.2.1.10  
142 were used to build a high-resolution phylogeny from the core SNP genome. We visualized the  
143 resulting phylogenetic tree, core genome SNPs, and recombination sites by using Phandango  
144 version v.1.3.0 (24).

## 145 **Code availability**

146 All tools used for the analysis are publicly available and fully described in the “Method”  
147 sections.

## 148 **Results**

149

### 150 **Multiple Staphylococcus species identified among unnamed staphylococcus** 151 **isolates**

152 A total of 253 uncharacterized staphylococcus genome sequences were downloaded from NCBI  
153 from August 2012 to March 2020 (median total length: 2.53498 megabases, median protein  
154 count: 2361 and median GC%: 32.7).

155 Twenty-four clusters were identified based on core and accessory pairwise distances between  
156 isolates using MinHash-optimized k-mer comparisons **Figure. 1**.

157

158 **Figure.1:** Twenty-four clusters were identified based on core and accessory pairwise distances  
159 between isolates using MinHash-optimized k-mer comparisons. Population clusters were  
160 visualized using microreact.  
161

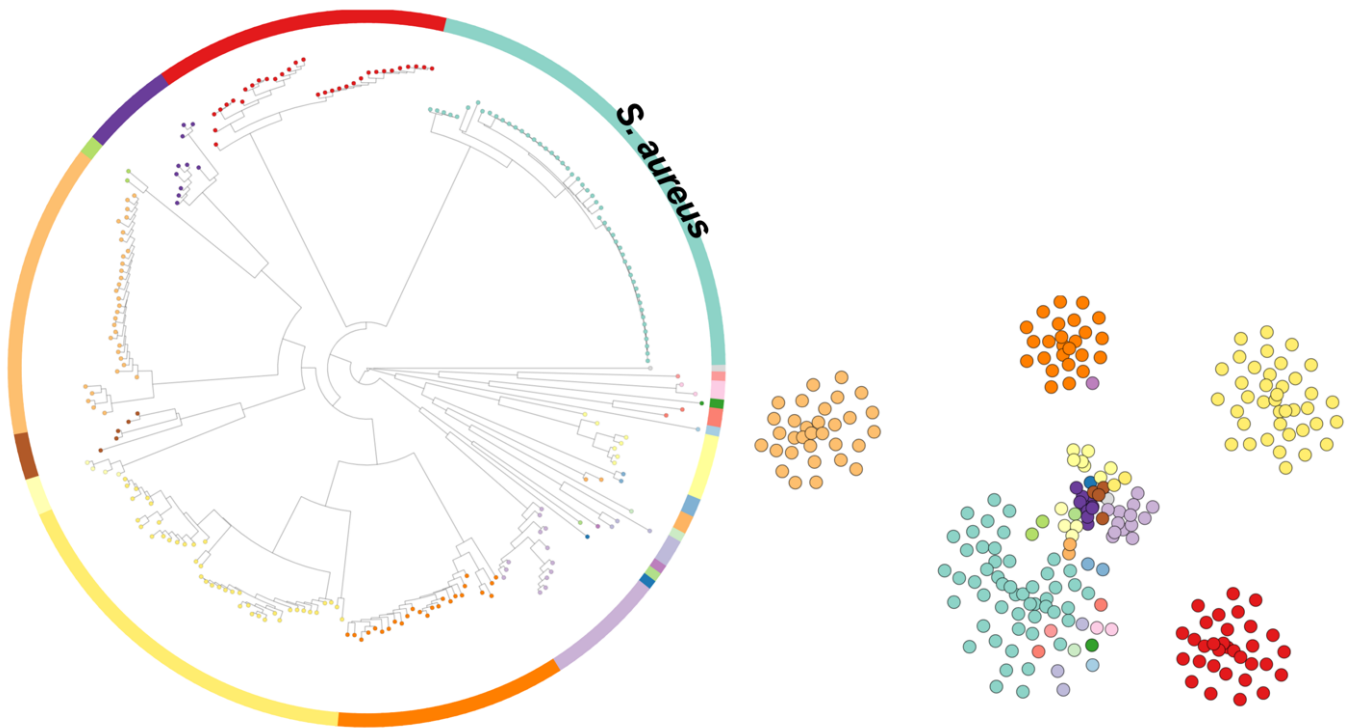

162  
163 MLST identified five species (*S. epidermidis* (33/253), *S. lugdunensis* (32/253), *S. haemolyticus*  
164 (41/253), *S. hominis* (24/253) and *S. aureus* (52/253)). Fifty-six isolates were not typed by  
165 MLST (20.94%). Forty-five *S. aureus* genomes categorized into seven clonal complexes (CC1,  
166 CC5, CC8, CC15, CC30, CC45, and CC97). Among those, twenty-two genomes belong to clonal  
167 complex CC5 (ST5; n=21 genomes and ST105; n=1 genome) and fourteen genomes grouped in  
168 CC8 (ST8; n=13 genomes and ST72; n=1 genome) **Figure.2.** MLST typing and clonal complex  
169 of *S. aureus* are listed in **Table S1.** MLST typing and allele profiles of the other four species are  
170 listed in **Table S2.**



171

172 **Figure.2:** MLST typing of *S. aureus* population. The data visualized using GrapeTree (25) and

173 nodes were colored based on sample ID.

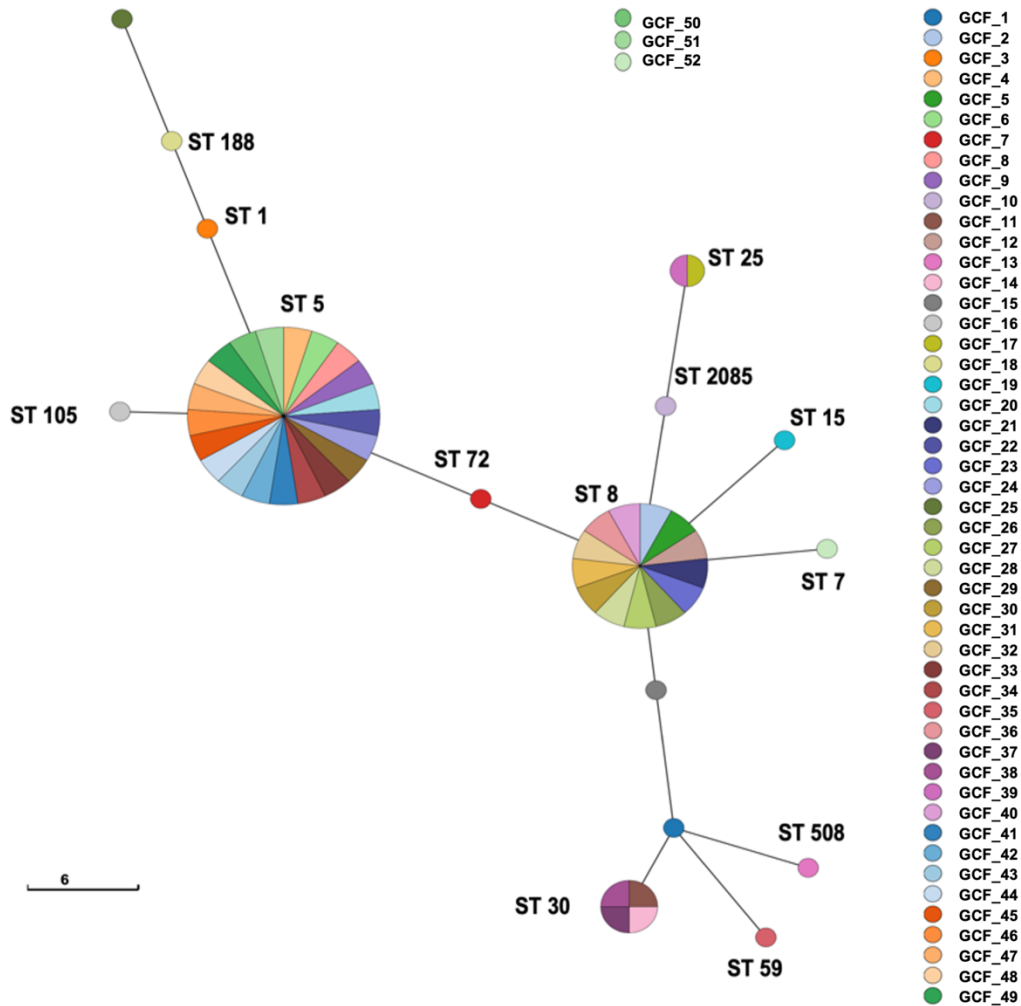

174

175

176

177

178 Type-based species clustering yielded 22 species clusters, within the staphylococcus genus, and  
179 the *S. aureus* isolates were assigned to the same cluster of *S. aureus* DSM 20231<sup>T</sup>. Moreover,  
180 using a 79% dDDH threshold as previously introduced (26), six of identified *S. aureus* (GCF\_1,  
181 GCF\_11, GCF\_13, GCF\_14, GCF\_37, and GCF\_38) were subclustered within the *S. aureus*  
182 population **Figure 3**. The resulting species and subspecies clusters and the taxonomic  
183 identification of the uncharacterized strains are listed in **Table S3**.

184 **Figure 3**. Tree inferred with FastME 2.1.6.1 from GBDP distances calculated from genome  
185 sequences. The branch lengths are scaled in terms of GBDP distance formula  $d_5$ . The numbers  
186 above branches are GBDP pseudo-bootstrap support values > 60 % from 100 replications, with  
187 average branch support of 36.0 %. The tree was rooted at the midpoint.

188

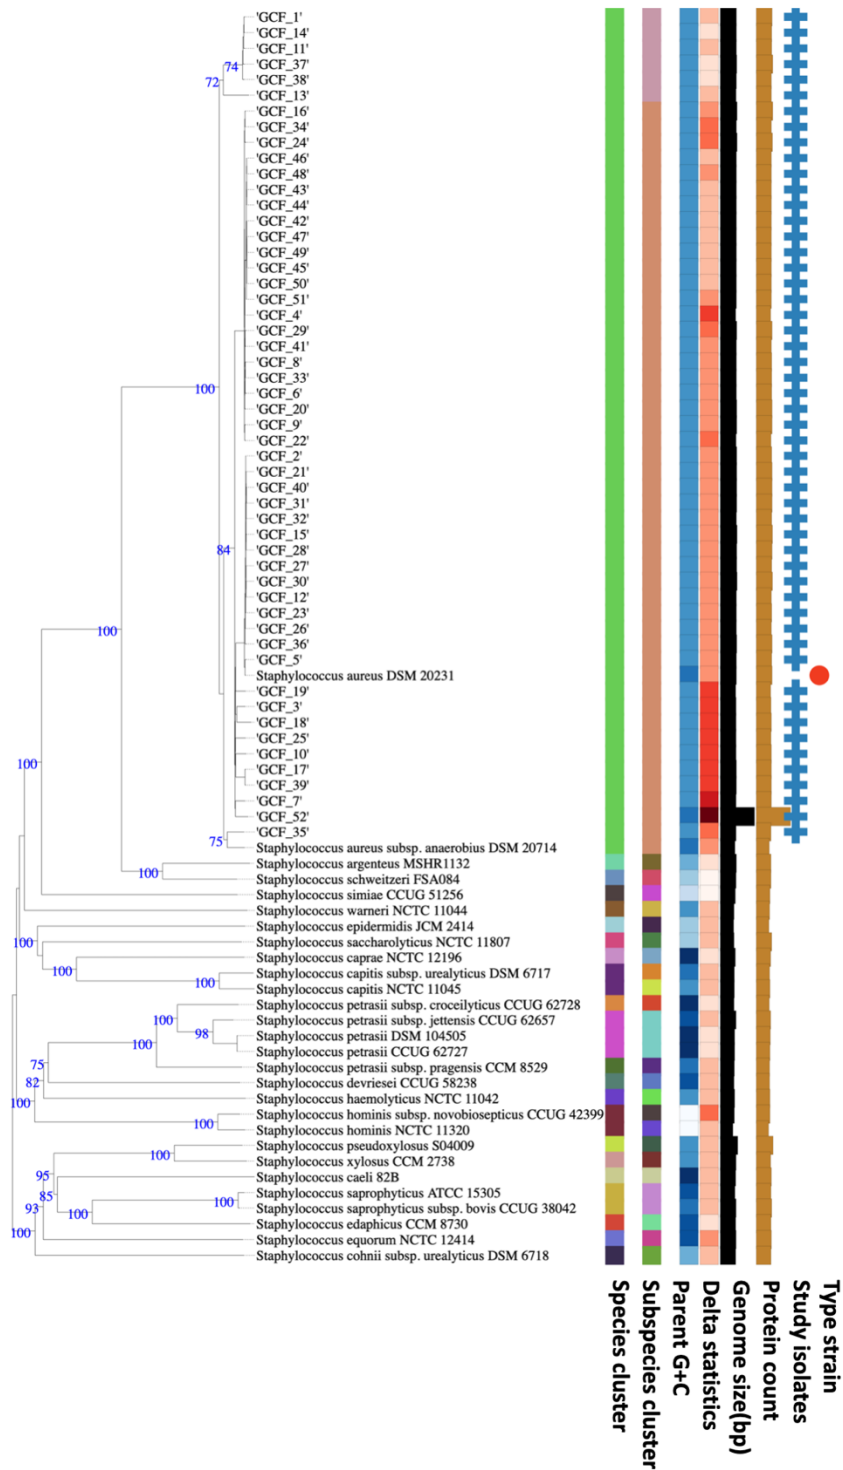

189

190

191 **Multidrug resistance and virulence genes were detected among *S. aureus***  
192 **isolates**

193 We used a protein-focused approach, AMRFinderPlus, to predict horizontally acquired  
194 antimicrobial resistance (AMR) genes and resistance alleles due to chromosomal mutations (20).  
195 Distribution of AMR determinants varied significantly across genomes **Table S4**. A query gene  
196 is accepted as a true AMR gene if it reaches a threshold of 95% sequence identity and 95%  
197 coverage when compared to the database. In *Staphylococcus*, two mechanisms confer penicillin  
198 resistance: the production of *blaZ*-encoded beta-lactamase, which inactivates the beta-lactam  
199 ring of penicillin by hydrolyzing the peptide bonds, and the *mecA*-encoded penicillin-binding  
200 protein PBP2a which has a lower affinity for all beta-lactam antibiotics (27). We detected *blaZ* in  
201 34 isolates representing 65.38% of the *S. aureus* population, and the *mecA* gene in 21 genomes  
202 representing 40.38% of the *S. aureus* population. Tetracyclines are broad-spectrum antibiotics  
203 used to treat many bacterial infections, and most tetracycline-resistant bacteria acquired  
204 tetracycline-resistant genes (*tet*). Two principal mechanisms of tetracycline resistance were  
205 identified in *S. aureus*: active efflux resulting from the acquisition of plasmid-located *tetK* and  
206 *tetL* genes or chromosomal-encoded Tet38 and ribosomal protection by elongation factor-like  
207 proteins that are encoded by chromosomal or transposon *tetM* or *tetO* determinants. The *tet38*  
208 gene was found in 51 isolates (98.07%), while *tetL* and *tetM* were detected in one (1.92%) and  
209 two (3.84%) genomes, respectively. Mupirocin-resistant isoleucine-tRNA ligase gene (*mupA*)  
210 was detected in one isolate (1.92%). Fosfomycin (FOM) is an antibiotic that inhibits UDP-N-  
211 acetylglucosamine enolpyruvyl transferase (MurA), an enzyme involved in the synthesis of the  
212 N-acetylmuramic acid, the essential component of peptidoglycan. Bacterial resistance to  
213 fosfomycin is due to chromosomal mutations and the expression of plasmid-encoded

214 fosfomycin-modifying enzymes. Mutations in *murA* have been shown to lower fosfomycin  
215 affinity for MurA (28). Additionally, fosfomycin intake may be decreased in the presence of  
216 mutations in *glpT* and/or *uhpT* that encode bacterial transport systems for fosfomycin (29, 30).  
217 Finally, fosfomycin activity may be inhibited by the catalytic activity of FosA, FosB, FosC, and  
218 FosX, respectively (31-33). Among all plasmid-mediated fosfomycin resistance genes, only  
219 the *fosB* gene was identified in Staphylococcus species (34). We detected four distinct point  
220 mutations in the *murA* gene. TypeII<sub>*murA*</sub> (Gly257Asp) was found in 13 isolates, TypeIII<sub>*murA*</sub>  
221 (Asp278Glu) was found in 5 isolates, TypeIV<sub>*murA*</sub> (Glu291Asp) was found in 7 isolates, and  
222 TypeVI<sub>*murA*</sub> (Thr396Asn) was found in 2 isolates. Moreover, five genomes contained TypeIV<sub>*glpT*</sub>  
223 (Val213Ile). The *FosB* gene was detected in 46 genomes. Many genomes carry genes that encode  
224 resistance against aminoglycosides (*aadD1*, *aph (3')-IIIa*, *ant (9')-Ia*; n = 8, 10, and 14 genomes,  
225 respectively), and streptothricin (*sat4*; n = 10 genomes). We also detected resistance  
226 determinants for macrolides (*abc-f*, *erm(A)* and *erm(C)*; n = 8, 10, and 14 genomes, respectively)  
227 Mutations in both *gyrA* (Ser84Ala; n = 1 genome and Ser84Leu; n = 13 genomes) and *parC*  
228 (Glu84Gly; n = 2 genomes, Glu84Lys; n = 1, Ser80Phe; n = 11 genomes, Ser80Tyr; n = 6  
229 genomes) were detected which is strongly linked to reduced fluoroquinolone susceptibility (35)  
230 **Table S4.**

231 We identified several *S. aureus* virulence genes in the *S. aureus* population **Table S5**. Genes  
232 coding for staphylocoagulase, adenosine synthase A (*adsA*), IgG-binding protein (*Sbi*), gamma-  
233 hemolysin component A and C, alpha-hemolysin (*hla*) beta-hemolysin (*hlyB*), delta-hemolysin  
234 (*hlyD*), capsular polysaccharide synthesis enzyme (*cap8A-G* and *cap8L-P*), iron-regulated surface  
235 determinant protein A, B, C, D, E, F and G, cell surface elastin binding protein (*ebp*), NPQTN  
236 specific sortase B, zinc metalloproteinase aureolysin (*aur*) were detected in all of the *S. aureus*

237 isolates. Genes coding for gamma-hemolysin component A (n= 50 genomes (96.15%)),  
238 Staphylokinase precursor (*sak*; n= 44 genomes (84.61%)) and complement inhibitor SCIN (*scn*;  
239 n= 46 genomes (88.46%)) were also detected.

## 240 **SCC*mec* typing, spa typing**

241 We examined the presence and types of SCC*mec* chromosomal cassette, which may promote the  
242 mobilization and distribution of *mecA* and other AMR genes in Staphylococcus. SCC*mec*  
243 elements are highly variable in structural organization and gene content. Still, they are classified  
244 mainly based on the *ccr* and *mec* gene complexes, the key elements of the cassette responsible  
245 for SCC*mec* integration and excision, and the beta-lactam resistance phenotype, respectively. To  
246 date, in *S. aureus* a total of 13 SCC*mec* types and various subtypes were described. We identified  
247 two known types of 21 *S. aureus* genomes carrying SCC*mec* (Type II, n=9 genomes (42.85%);  
248 Type IV, n=11 genomes (52.38%)). **Table.1.**

249 Spa typing of *S. aureus* isolates revealed fifteen different spa types (t002, t008, t189, t091, t535,  
250 t227, t017, t338, t723, t4359, t4601, t1055, t7180, t4238, and t3240) in 28 genomes (53.84%)  
251 **Table S6.** The spa types t002, t008, t189 were common among ten strains (35.71%), four strains  
252 (14.28%), and two strains (7.14%), respectively.

253

254

255

256

257 **Table.1:** Predicted SCCmec element in *S. aureus* population

| No. | Sample | Predicted SCCmec element | %template coverage |
|-----|--------|--------------------------|--------------------|
| 1   | GCF_2  | SCCmec_type_IVa(2B)      | 88.91%             |
| 2   | GCF_4  | SCCmec_type_II(2A)       | 99.75%             |
| 3   | GCF_9  | SCCmec_type_II(2A)       | 99.29%             |
| 4   | GCF_12 | SCCmec_type_IVa(2B)      | 87.45%             |
| 5   | GCF_15 | SCCmec_type_IVa(2B)      | 87.81%             |
| 6   | GCF_16 | SCCmec_type_II(2A)       | 99.09%             |
| 7   | GCF_20 | SCCmec_type_II(2A)       | 99.59%             |
| 8   | GCF_21 | SCCmec_type_IVa(2B)      | 86.78%             |
| 9   | GCF_23 | SCCmec_type_IVa(2B)      | 87.73%             |
| 10  | GCF_24 | SCCmec_type_II(2A)       | 99.60%             |
| 11  | GCF_26 | SCCmec_type_IVa(2B)      | 88.63%             |
| 12  | GCF_27 | SCCmec_type_IVa(2B)      | 88.11%             |
| 13  | GCF_28 | SCCmec_type_IVa(2B)      | 87.33%             |
| 14  | GCF_29 | SCCmec_type_II(2A)       | 99.27%             |
| 15  | GCF_30 | SCCmec_type_IVa(2B)      | 87.56%             |
| 16  | GCF_31 | SCCmec_type_IVa(2B)      | 87.17%             |
| 17  | GCF_32 | SCCmec_type_IVa(2B)      | 87.29%             |
| 18  | GCF_33 | SCCmec_type_II(2A)       | 99.18%             |
| 19  | GCF_34 | SCCmec_type_II(2A)       | 99.38%             |
| 20  | GCF_36 | SCCmec_type_IVg(2B)      | 79.41%             |
| 21  | GCF_38 | SCCmec_type_II(2A)       | 51.08%             |

258

259

## 260 A core genome single-nucleotide-polymorphism (SNP) phylogeny

261 Core genome SNPs-based phylogeny has a higher discriminatory speciation power compared to  
262 16S rRNA-based phylogenetic clustering. Variants were called using snippy, which wraps  
263 BWA-MEM, SAMtools, SnpEff, and Freebayes. Core SNPs were identified as variant sites  
264 present in all samples and extracted at default settings with snippy. *S. aureus* NCTC 8325 was  
265 used as a reference genome for variant annotations. GCF-13 (ST508) was overly distinct in its  
266 high total number of SNPs, both inside and outside the boundaries of recombination blocks.  
267 GCF\_45, GCF\_51, GCF\_49, GCF\_4, GCF\_20, GCF\_33, GCF\_2, GCF\_26, GCF\_27, GCF\_3  
268 and GCF\_1 had no SNPs **Figure.4**.

269 **Figure.4:** Core genome SNPs-based phylogenetic tree and genome-wide recombination  
270 hotspots.

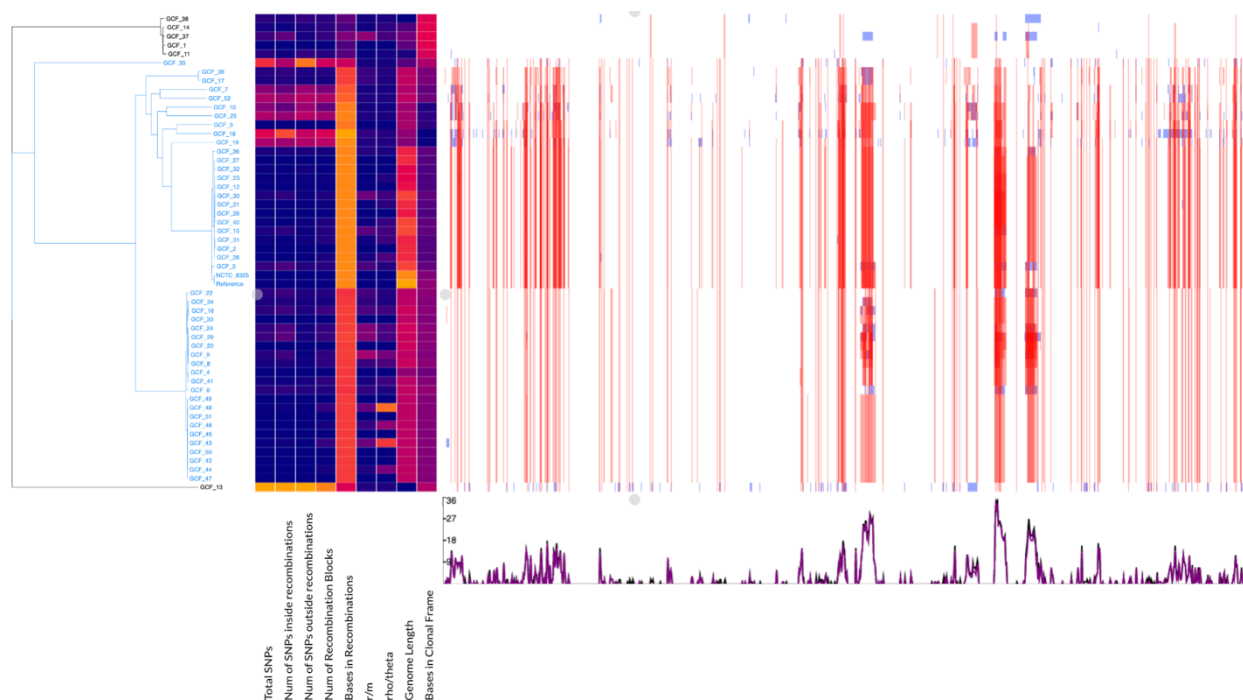



## 272 **Discussion**

273 A total of 54 species of staphylococcus are publicly accessible in Genbank, where the genomes  
274 of the same species are grouped under a single ID. There are, however, 253 unknown genomes  
275 (ID:13533) annotated as isolates in a staphylococcus population, which are significantly different  
276 from currently recognized species. In this study, using a genomic approach, we identified these  
277 genomes at the species level. About 182 uncharacterized Staphylococcus genomes were  
278 identified at the species level based on MLST, including 32 *S. lugdunensis* genome sequence,  
279 thus doubling the number of the publicly accessible *S. lugdunensis* genome sequence in  
280 Genbank. MLST identified five species, *S. aureus*, *S. epidermidis*, *S. lugdunensis*, *S.*  
281 *haemolyticus* and *S. hominis*, from uncategorized genome sequences in the NCBI database.

282 We identified several *S. aureus* virulence and antimicrobial resistance genes in the *S.*  
283 *aureus* population. There are six isolates (GCF\_1, GCF\_11 (ST30), GCF\_13, GCF\_14 (ST30),  
284 GCF\_37 (ST30), and GCF\_38) were subclustered close to each other within the *S. aureus*  
285 population, having similar preference in recombining loci. These isolates, except GCF\_13, are of  
286 sequence type 30 and belong to clonal complex 30. However, GCF-13 (ST508) was overly  
287 distinct in its high total number of SNPs, both inside and outside the boundaries of  
288 recombination blocks.

289 Fifty-six isolates were not typed by MLST (20.94%). These isolates may belong to  
290 staphylococcus species that do not have MLST databases such as *Staphylococcus schleiferi* and  
291 *Staphylococcus cornubiensis*, which calls attention to the need for creating MLST databases for  
292 these species.

293 We used a protein-focused approach, AMRFinderPlus, to predict horizontally acquired  
294 antimicrobial resistance (AMR) genes and resistance alleles due to chromosomal mutations for  
295 several reasons. First, protein annotation and similarity comparisons to both reference proteins  
296 and the use of Hidden Markov models (HMMs) with appropriate cutoffs may help to decide  
297 whether the gene is in frame and of the correct length. In contrast, a nucleotide approach can  
298 miss nonsense mutations. Second, the AMR function is encoded by the protein sequence. Even  
299 changes in single amino acid can alter resistance phenotypes considerably, and that variation  
300 should be explicitly captured. Thirdly, discordance between nucleotides and protein sequences  
301 can lead to alleles misassignment and, thus, the possibility of the incorrect prediction of AMR  
302 (20).

303 In summary, our study 182 uncharacterized *Staphylococcus* genomes were identified, including  
304 52 *S. aureus* genome sequences. Comparative genomics of the identified *S. aureus* isolates will  
305 give additional insights and enhances our knowledge of *S. aureus* species' evolution.

## 306 Reference

- 307  
308 1. Lowy FD. *Staphylococcus aureus* infections. *New England journal of medicine*.  
309 1998;339(8):520-32.  
310 2. Reacher MH, Shah A, Livermore DM, Wale MCJ, Graham C, Johnson AP, et al.  
311 Bacteraemia and antibiotic resistance of its pathogens reported in England and Wales between  
312 1990 and 1998: trend analysis. *Bmj*. 2000;320(7229):213-6.  
313 3. Lakhundi S, Zhang K. Methicillin-Resistant *Staphylococcus aureus*: Molecular  
314 Characterization, Evolution, and Epidemiology. *Clin Microbiol Rev*. 2018;31(4):e00020-18.  
315 4. Projan SJ. Whither antibacterial drug discovery? (1359-6446 (Print)).  
316 5. Spaan AN, Surewaard Bg Fau - Nijland R, Nijland R Fau - van Strijp JAG, van Strijp JA.  
317 Neutrophils versus *Staphylococcus aureus*: a biological tug of war. (1545-3251 (Electronic)).  
318 6. Zurek OW, Pallister KB, Voyich JM. *Staphylococcus aureus* Inhibits Neutrophil-derived  
319 IL-8 to Promote Cell Death. (1537-6613 (Electronic)).  
320 7. Benson DA, Karsch-Mizrachi I, Lipman DJ, Ostell J, Sayers EW. GenBank. *Nucleic*  
321 *Acids Res*. 2010;38(Database issue):D46-D51.  
322 8. Seemann T. Prokka: rapid prokaryotic genome annotation. (1367-4811 (Electronic)).

- 323 9. Lees JA, Harris SR, Tonkin-Hill G, Gladstone RA, Lo SW, Weiser JN, et al. Fast and  
324 flexible bacterial genomic epidemiology with PopPUNK. *Genome Research*. 2019;29(2):304-16.
- 325 10. Meier-Kolthoff JP, Goker M. TYGS is an automated high-throughput platform for state-  
326 of-the-art genome-based taxonomy. *Nat Commun*. 2019;10(1):2182.
- 327 11. Ondov BD, Treangen TJ, Melsted P, Mallonee AB, Bergman NH, Koren S, et al. Mash:  
328 fast genome and metagenome distance estimation using MinHash. *Genome Biol*.  
329 2016;17(1):132.
- 330 12. Lagesen K, Hallin P, Rodland EA, Staerfeldt HH, Rognes T, Ussery DW. RNAmmer:  
331 consistent and rapid annotation of ribosomal RNA genes. *Nucleic Acids Res*. 2007;35(9):3100-8.
- 332 13. Camacho C, Coulouris G, Avagyan V, Ma N, Papadopoulos J, Bealer K, et al. BLAST+:  
333 architecture and applications. *BMC Bioinformatics*. 2009;10:421.
- 334 14. Meier-Kolthoff JP, Auch AF, Klenk HP, Goker M. Genome sequence-based species  
335 delimitation with confidence intervals and improved distance functions. *BMC Bioinformatics*.  
336 2013;14:60.
- 337 15. Lefort V, Desper R, Gascuel O. FastME 2.0: A Comprehensive, Accurate, and Fast  
338 Distance-Based Phylogeny Inference Program. *Mol Biol Evol*. 2015;32(10):2798-800.
- 339 16. Farris JS. Estimating Phylogenetic Trees from Distance Matrices. *The American*  
340 *Naturalist*. 1972;106(951):645-68.
- 341 17. Kreft L, Botzki A, Coppens F, Vandepoele K, Van Bel M. PhyD3: a phylogenetic tree  
342 viewer with extended phyloXML support for functional genomics data visualization.  
343 *Bioinformatics*. 2017;33(18):2946-7.
- 344 18. Seemann T. mlst. Github <https://github.com/tseemann/mlst>.
- 345 19. Jolley KA, Maiden MC. BIGSdb: Scalable analysis of bacterial genome variation at the  
346 population level. *BMC Bioinformatics*. 2010;11:595.
- 347 20. Feldgarden M, Brover V, Haft DH, Prasad AB, Slotta DJ, Tolstoy I, et al. Validating the  
348 AMRFinder Tool and Resistance Gene Database by Using Antimicrobial Resistance Genotype-  
349 Phenotype Correlations in a Collection of Isolates. *Antimicrob Agents Chemother*. 2019;63(11).
- 350 21. Kaya H, Hasman H, Larsen J, Stegger M, Johannesen TB, Allesoe RL, et al.  
351 SCCmecFinder, a Web-Based Tool for Typing of Staphylococcal Cassette Chromosome mec in  
352 Staphylococcus aureus Using Whole-Genome Sequence Data. *mSphere*. 2018;3(1).
- 353 22. Bartels MD, Petersen A, Worning P, Nielsen JB, Lerner-Svensson H, Johansen HK, et al.  
354 Comparing whole-genome sequencing with Sanger sequencing for spa typing of methicillin-  
355 resistant Staphylococcus aureus. *J Clin Microbiol*. 2014;52(12):4305-8.
- 356 23. Croucher NJ, Page AJ, Connor TR, Delaney AJ, Keane JA, Bentley SD, et al. Rapid  
357 phylogenetic analysis of large samples of recombinant bacterial whole genome sequences using  
358 Gubbins. *Nucleic Acids Res*. 2015;43(3):e15.
- 359 24. Hadfield J, Croucher NJ, Goater RJ, Abudahab K, Aanensen DM, Harris SR. Phandango:  
360 an interactive viewer for bacterial population genomics. *Bioinformatics*. 2018;34(2):292-3.
- 361 25. Zhou Z, Alikhan NF, Sergeant MJ, Luhmann N, Vaz C, Francisco AP, et al. GrapeTree:  
362 visualization of core genomic relationships among 100,000 bacterial pathogens. *Genome Res*.  
363 2018;28(9):1395-404.
- 364 26. Meier-Kolthoff JP, Hahnke RL, Petersen J, Scheuner C, Michael V, Fiebig A, et al.  
365 Complete genome sequence of DSM 30083(T), the type strain (U5/41(T)) of *Escherichia coli*,  
366 and a proposal for delineating subspecies in microbial taxonomy. *Stand Genomic Sci*. 2014;9:2.

- 367 27. Llarrull LI, Fisher JF, Mobashery S. Molecular Basis and Phenotype of Methicillin  
368 Resistance in *Staphylococcus aureus* and Insights into New  $\beta$ -Lactams  
369 That Meet the Challenge. *Antimicrobial Agents and Chemotherapy*. 2009;53(10):4051.
- 370 28. Jiang S, Gilpin ME, Attia M, Ting Y-L, Berti PJ. Lyme disease enolpyruvyl-UDP-  
371 GlcNAc synthase: fosfomycin-resistant MurA from *Borrelia burgdorferi*, a fosfomycin-sensitive  
372 mutant, and the catalytic role of the active site Asp. *Biochemistry*. 2011;50(12):2205-12.
- 373 29. Takahata S, Ida T, Hiraishi T, Sakakibara S, Maebashi K, Terada S, et al. Molecular  
374 mechanisms of fosfomycin resistance in clinical isolates of *Escherichia coli*. *International journal*  
375 *of antimicrobial agents*. 2010;35(4):333-7.
- 376 30. Michalopoulos AS, Livaditis IG, Gougoutas V. The revival of fosfomycin. *International*  
377 *journal of infectious diseases*. 2011;15(11):e732-e9.
- 378 31. Garcia P, Arca P, Suarez JE. Product of fosC, a gene from *Pseudomonas syringae*,  
379 mediates fosfomycin resistance by using ATP as cosubstrate. *Antimicrobial agents and*  
380 *Chemotherapy*. 1995;39(7):1569-73.
- 381 32. Fillgrove KL, Pakhomova S, Schaab MR, Newcomer ME, Armstrong RN. Structure and  
382 mechanism of the genomically encoded fosfomycin resistance protein, FosX, from *Listeria*  
383 *monocytogenes*. *Biochemistry*. 2007;46(27):8110-20.
- 384 33. Lee S-Y, Park Y-J, Yu JK, Jung S, Kim Y, Jeong SH, et al. Prevalence of acquired  
385 fosfomycin resistance among extended-spectrum  $\beta$ -lactamase-producing *Escherichia coli* and  
386 *Klebsiella pneumoniae* clinical isolates in Korea and IS 26-composite transposon surrounding  
387 fosA3. *Journal of Antimicrobial Chemotherapy*. 2012;67(12):2843-7.
- 388 34. Fu Z, Liu Y, Chen C, Guo Y, Ma Y, Yang Y, et al. Characterization of Fosfomycin  
389 Resistance Gene, fosB, in Methicillin-Resistant *Staphylococcus aureus* Isolates. *PloS one*.  
390 2016;11(5):e0154829-e.
- 391 35. Yamada M, Yoshida J, Hatou S, Yoshida T, Minagawa Y. Mutations in the quinolone  
392 resistance determining region in *Staphylococcus epidermidis* recovered from conjunctiva and  
393 their association with susceptibility to various fluoroquinolones. *Br J Ophthalmol*.  
394 2008;92(6):848-51.
- 395  
396
